# Supplementary material
Source: PubMed Central journal article supplement (PMC4490362)
Supplement: ncomms8440-s1.pdf [file ncomms8440-s1.pdf]

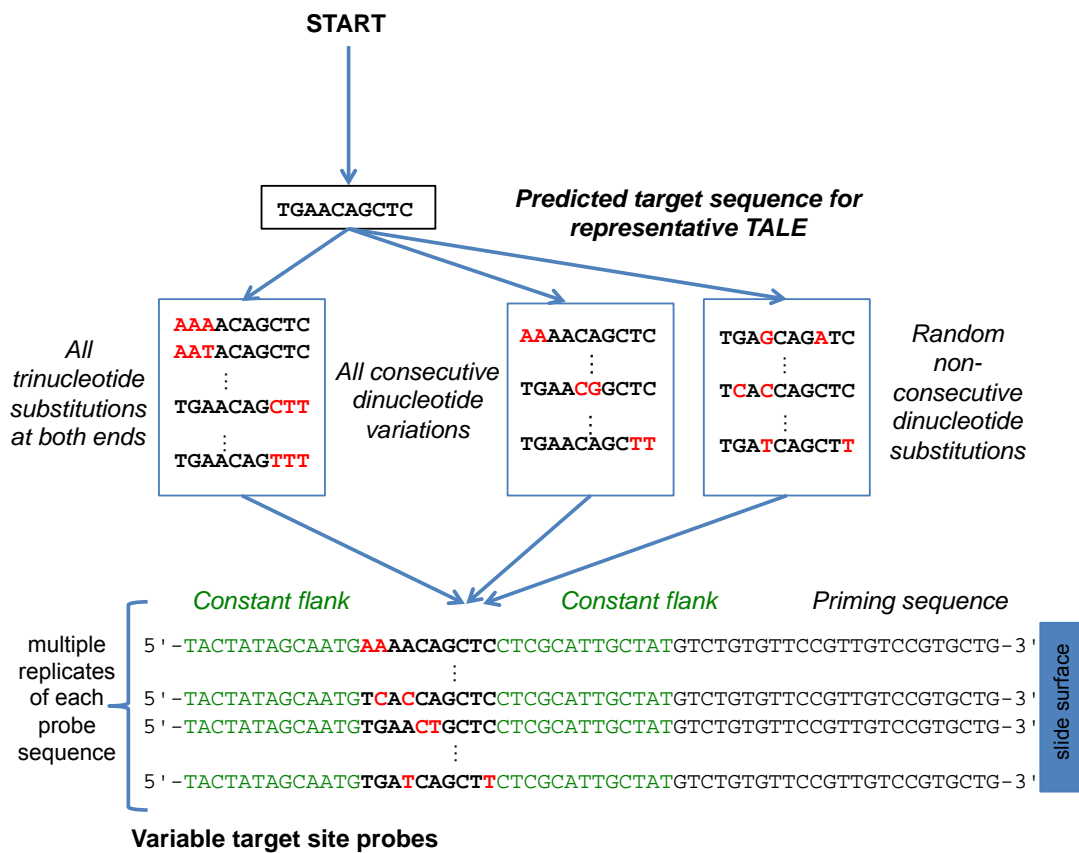

## Supplementary Figure 1

### Design of probes on custom arrays

Schematic representation of custom arrays design for a representative TALE protein. The distribution of probe sets on the 4 different custom array designs is described in Supplementary Note 1. Red font indicates variable sequences, while green font indicates constant sequence.

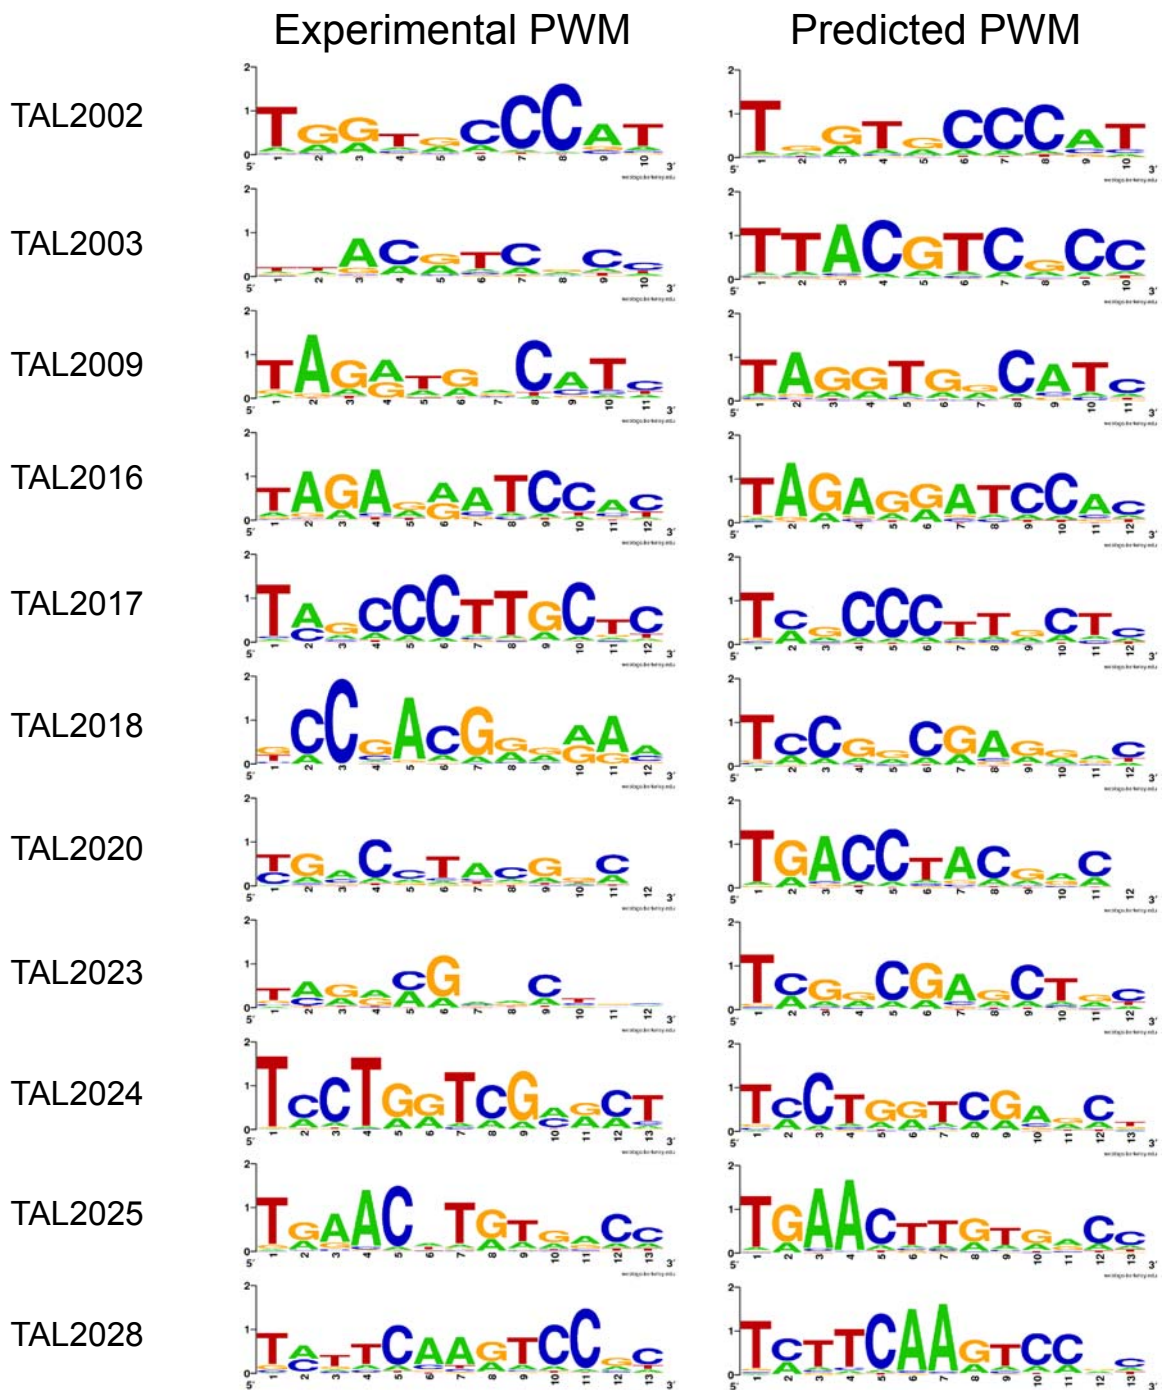

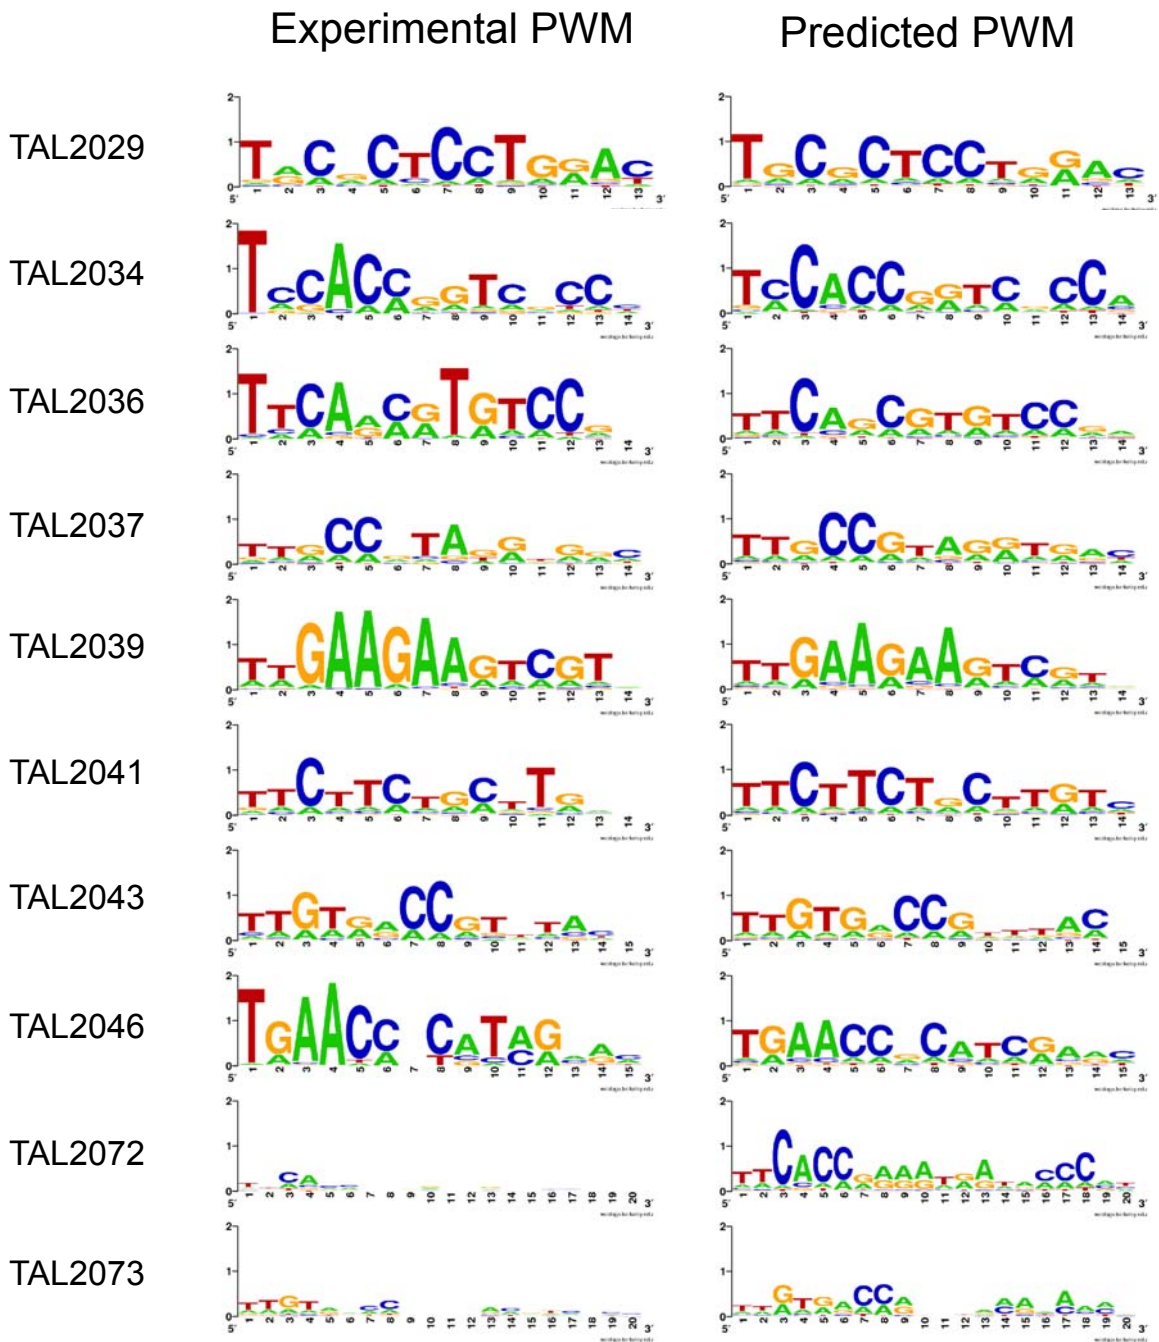

**Supplementary Figure 2**

**Position weight matrices of all TALE proteins in this study**

Experimental PWMs are derived from PBM experiments, as shown in Fig. 2a. Predicted PWMs are predicted by the SIFTED model, as described in Methods.

**(a) Replicate PBM experiments**

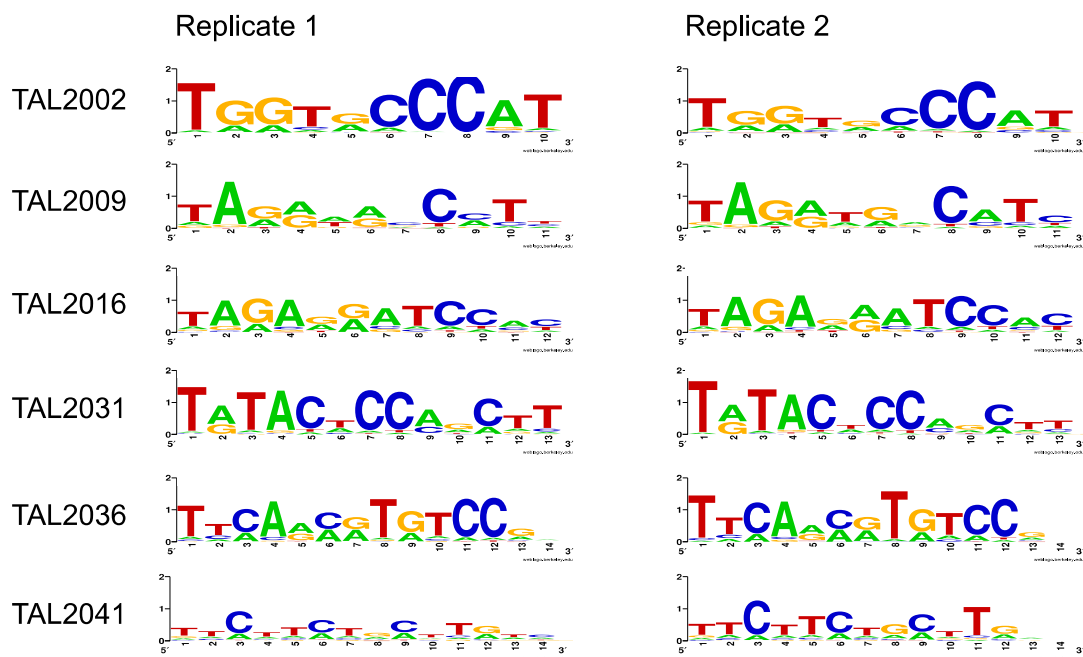

**(b) PBMs performed at different concentrations**

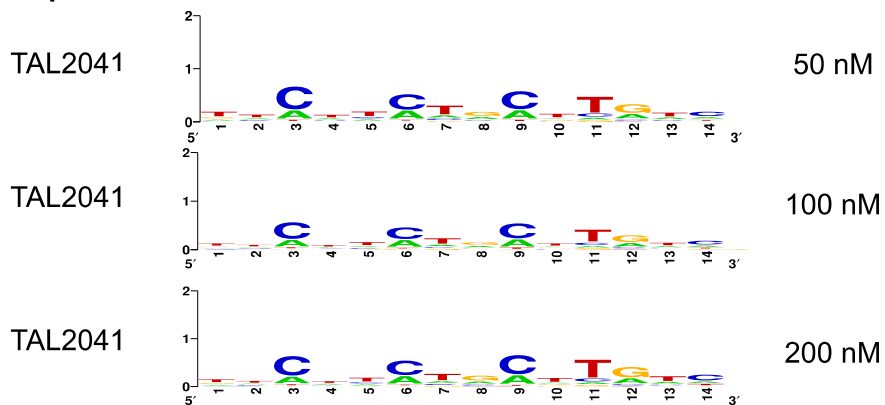

**Supplementary Figure 3**

**PBM (a) replicates, or (b) experiments performed at different concentrations of the TALE protein.**

(a) PWM logos are shown for two replicates of six TALE proteins. (b) PWMs are shown for one TALE protein, from PBM experiments performed at three concentrations. All PWMs are consistent across replicates and concentrations.

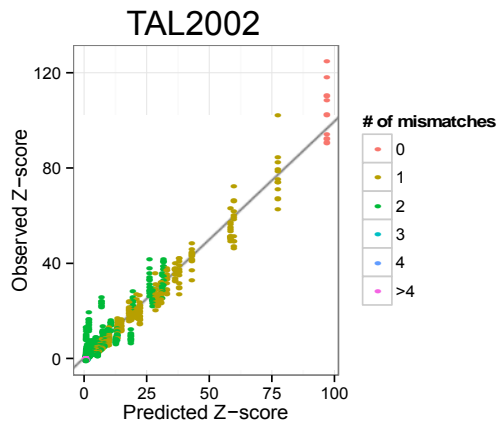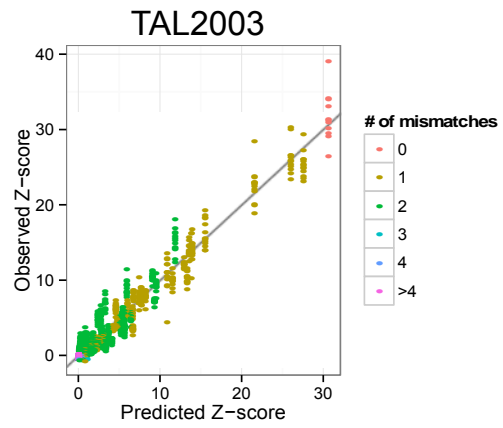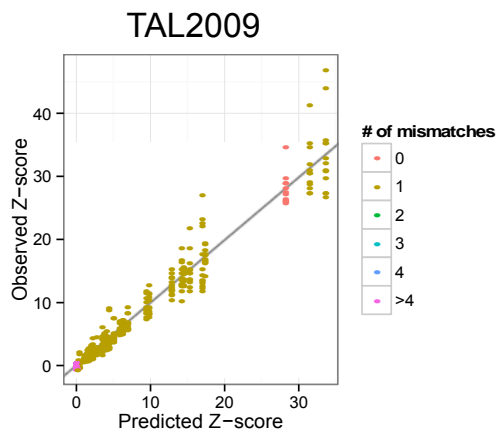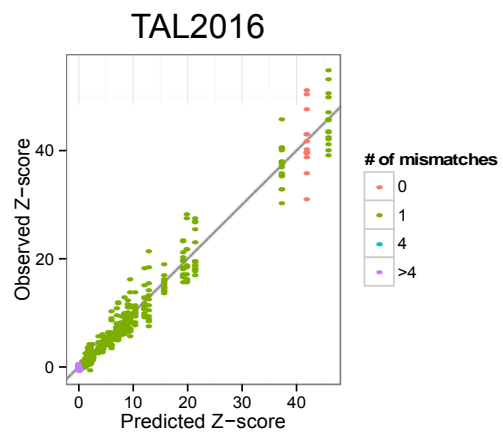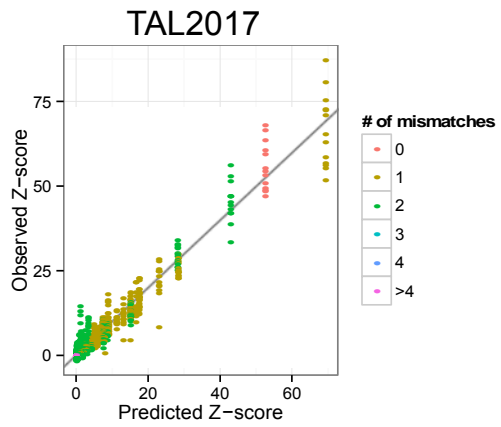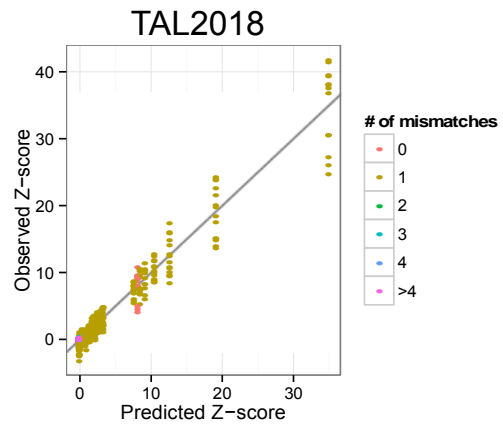

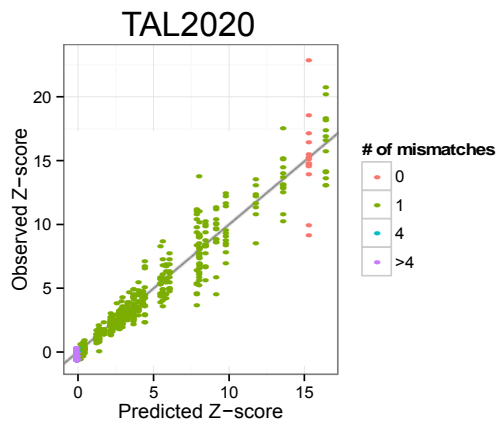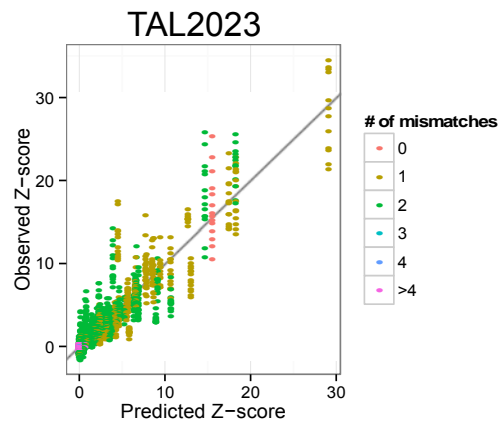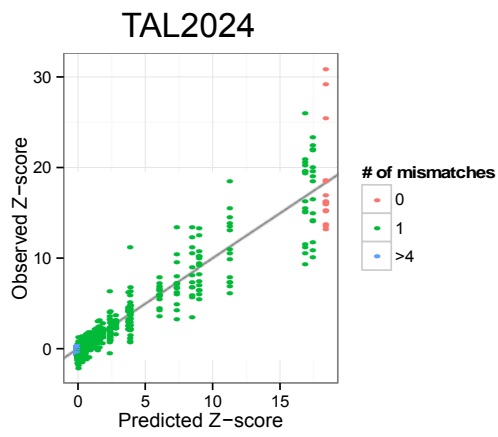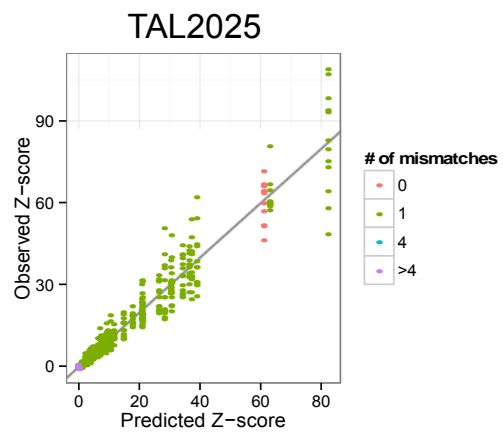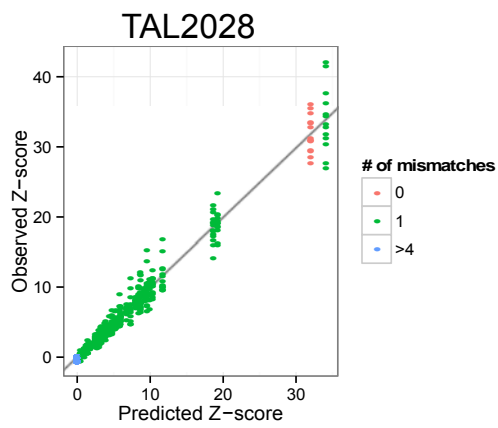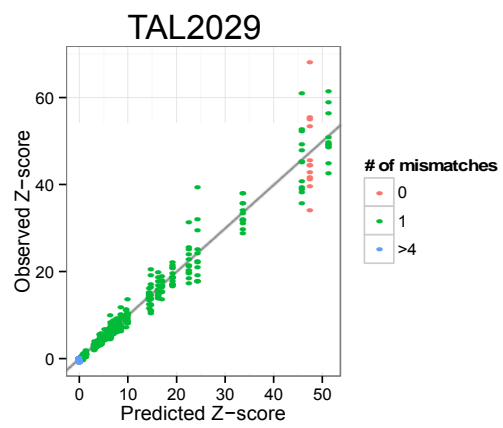

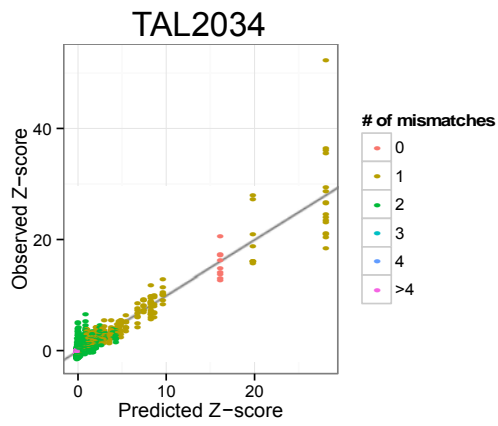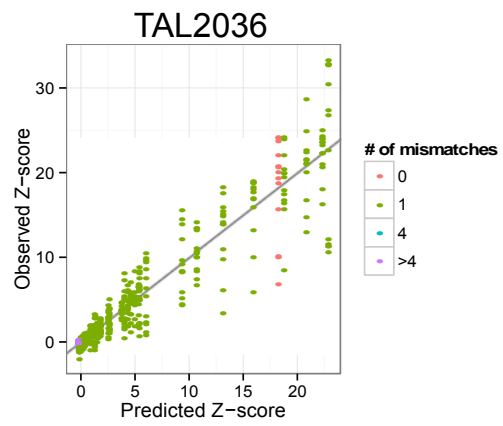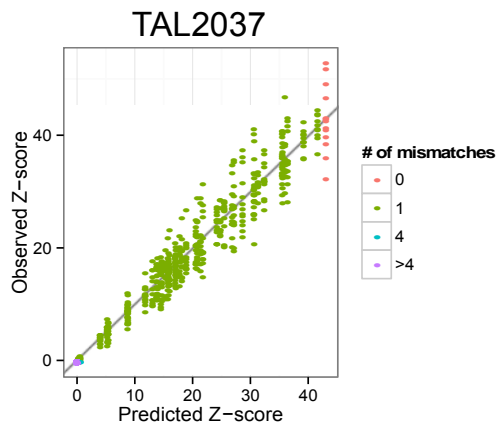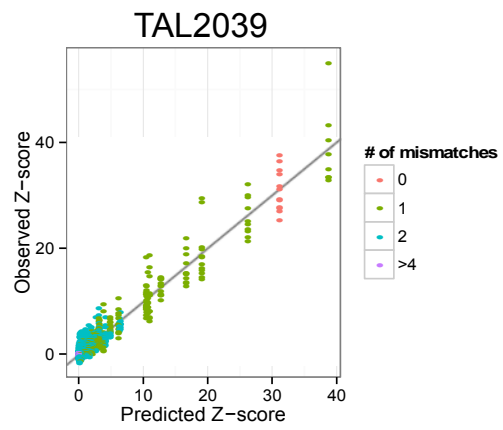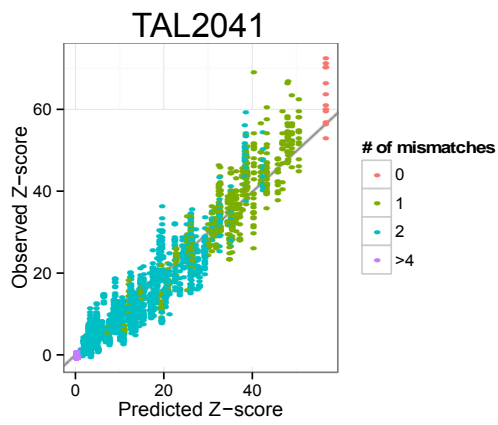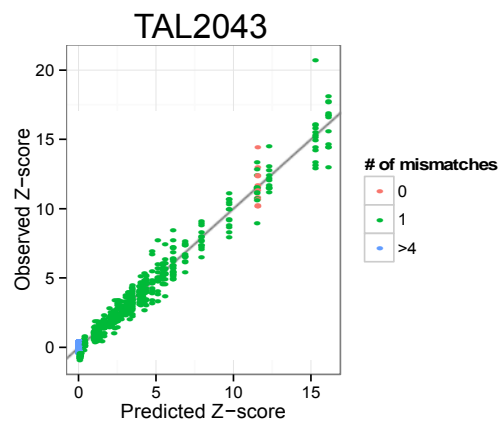

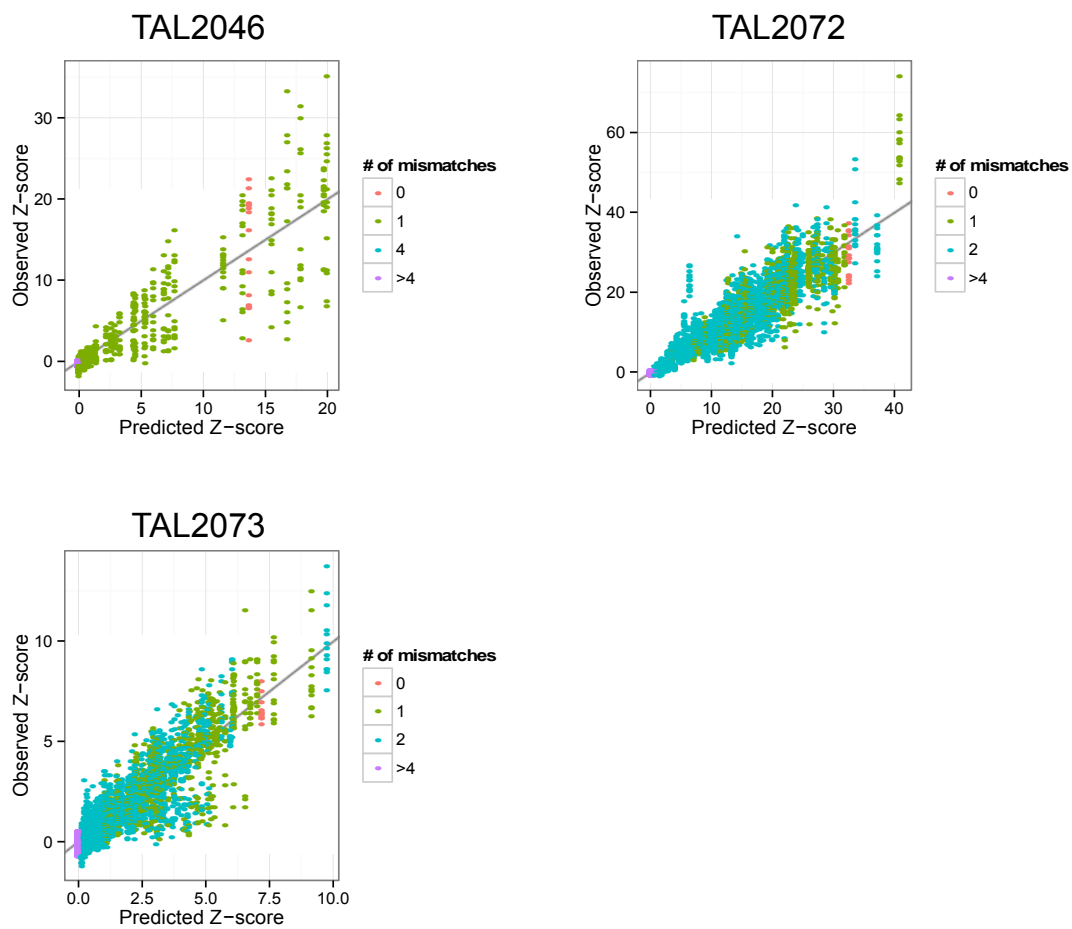

#### Supplementary Figure 4

##### Scatter plots of experimental vs. predicted probe intensity

Comparison between the probe z-scores measured by PBMs and the z-scores predicted by the derived PWM (see Methods). For each probe sequence, at least eight observed z-score replicates are shown. Points are colored by the number of mismatches between the sequence in the probe and the consensus sequence predicted from RVD identities as in Fig. 2b.



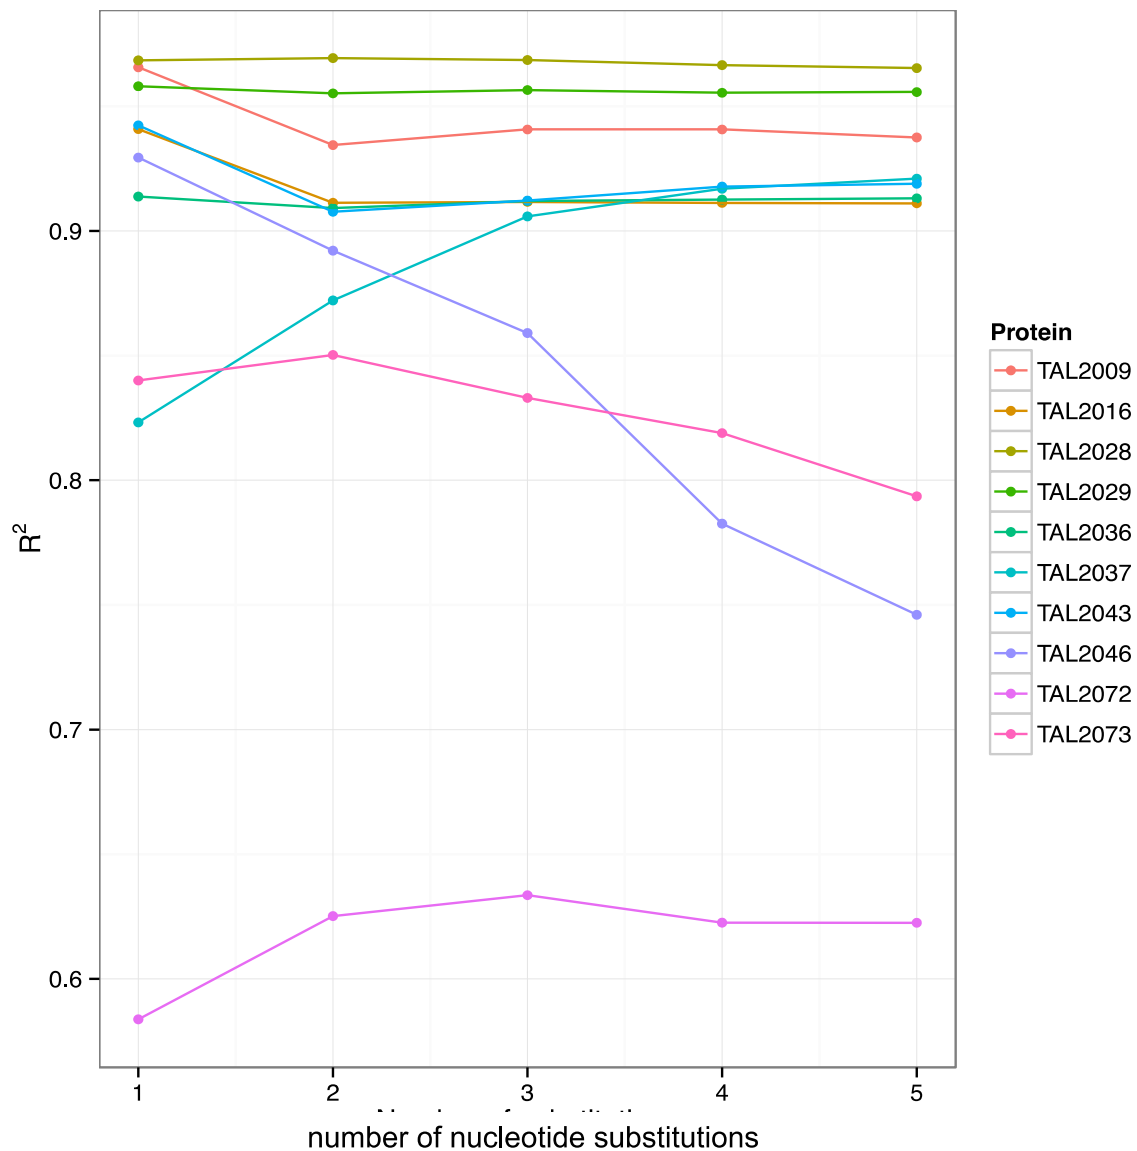

### Supplementary Figure 5

#### PWMs can explain binding to probes with up to five nucleotide substitutions

$R^2$  between probe z-scores measured in PBMs and the z-score predicted by the derived PWM is shown for ten proteins.  $R^2$  is defined as  $1 - (\text{residual sum of squares}) / (\text{total sum of squares})$ .

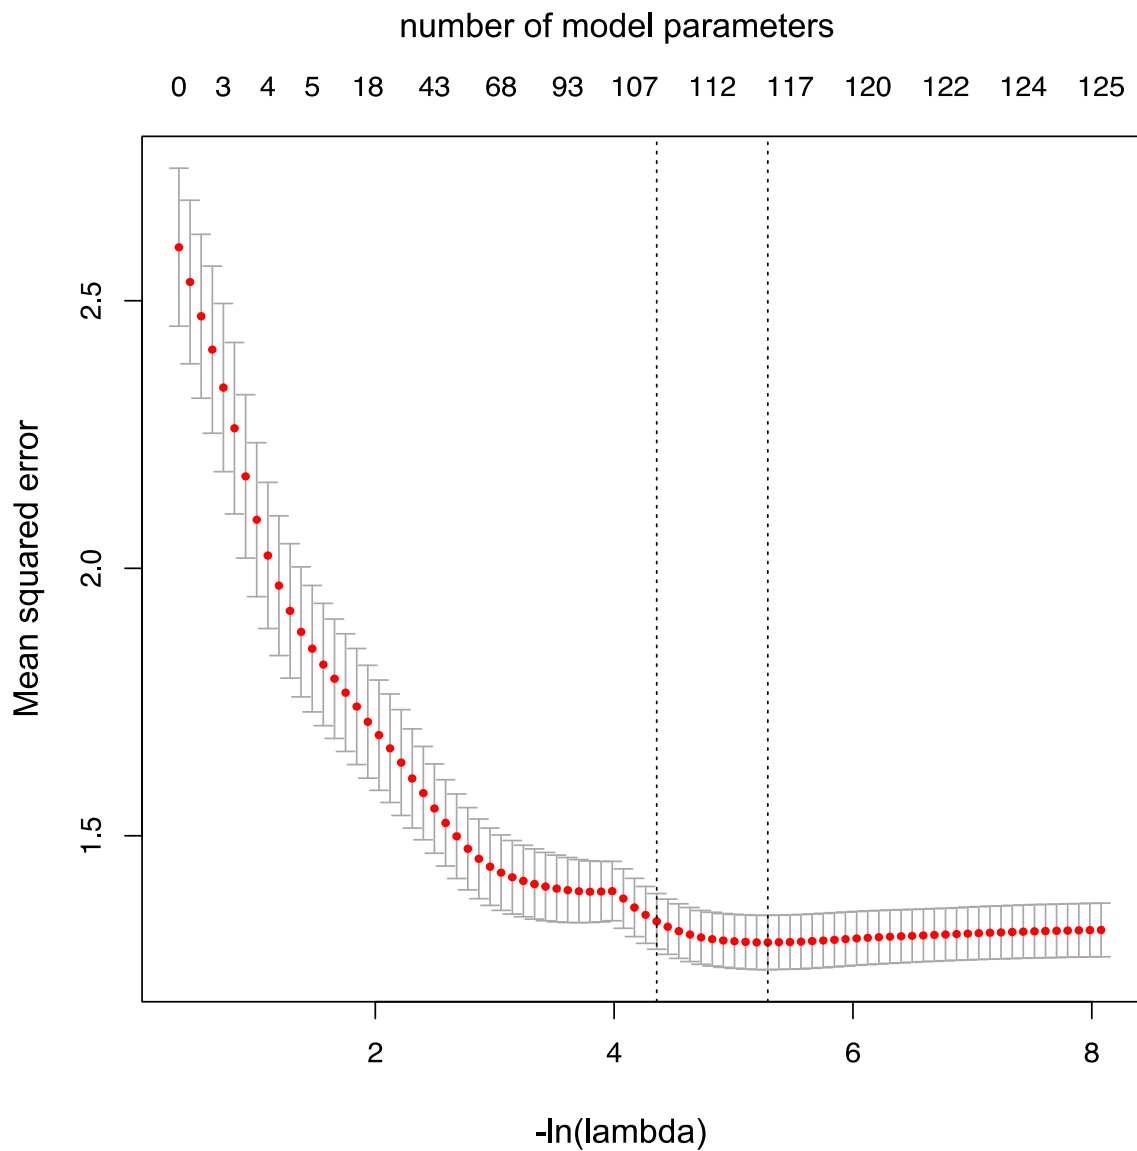

### Supplementary Figure 6

#### SIFTED feature selection using Elastic Net Regularization

The mean squared error (MSE) is shown for different values of the regularization parameter  $\lambda$ . Error bars represent 1 standard deviation. The right-most dashed vertical line shows the value of  $\lambda$  with the lowest average MSE. The left-most dashed vertical line is the simplest model that performs within one standard deviation of the model with the lowest MSE, and was selected for the final model.

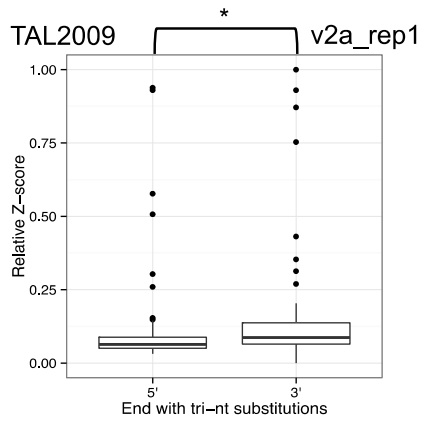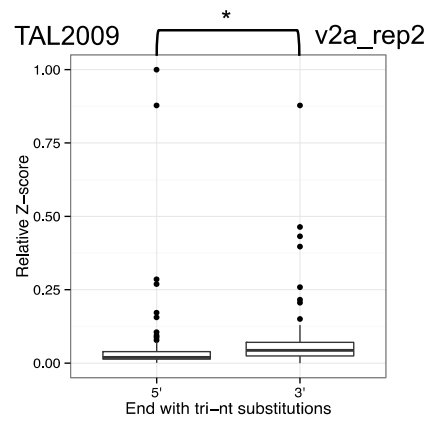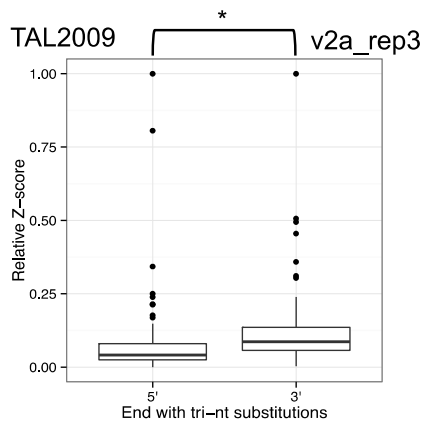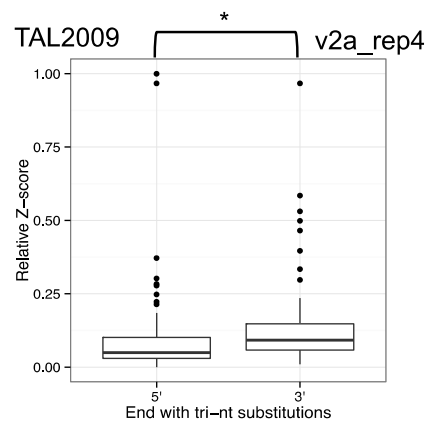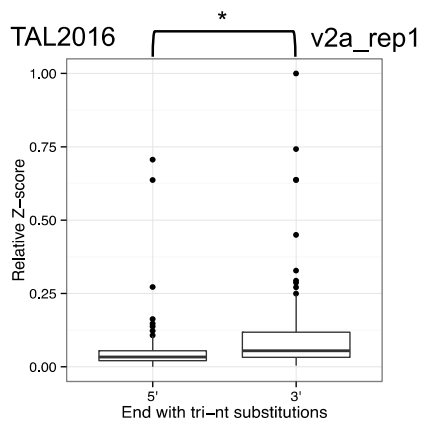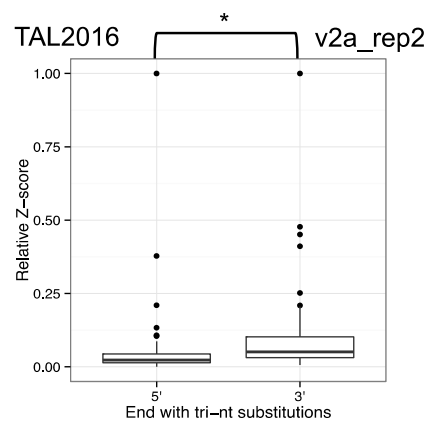

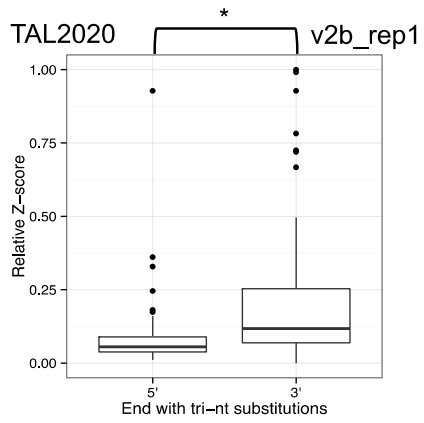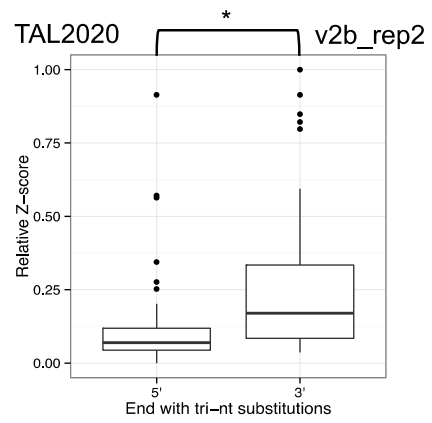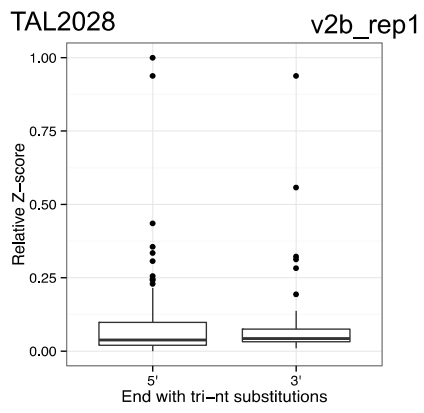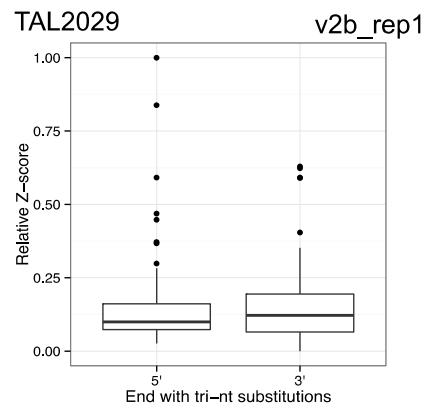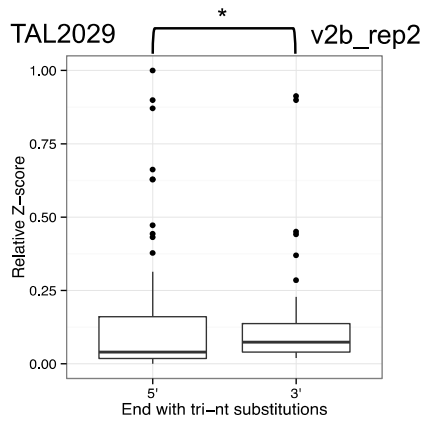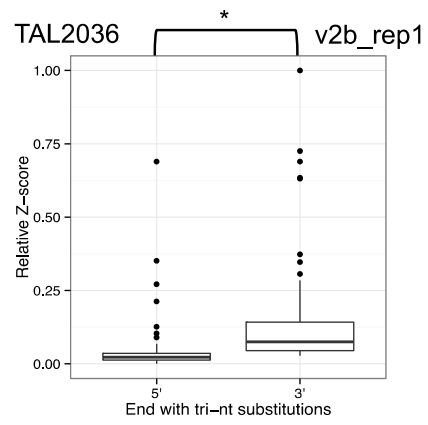

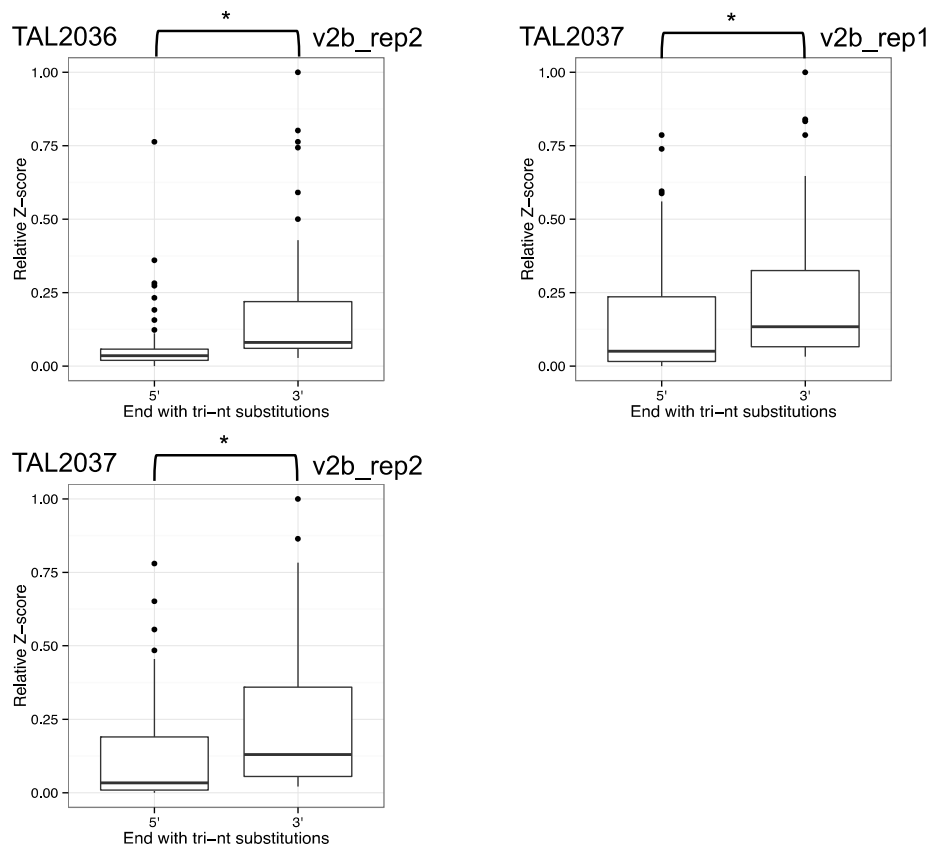

### Supplementary Figure 7

#### Substitutions clustered at 5' end of the TALE target site affect binding affinity more than those at the 3' end

For each protein and experiment (named as in Supplementary Table 1), effects of substitutions clustered at the 5' and 3' end of the binding sites are shown. Z-scores are scaled such that the highest observed value is 1 and the lowest observed value is 0. Box plots are formatted as in Fig. 3a. \* =  $P < 0.05$ , Wilcoxon signed-rank test.

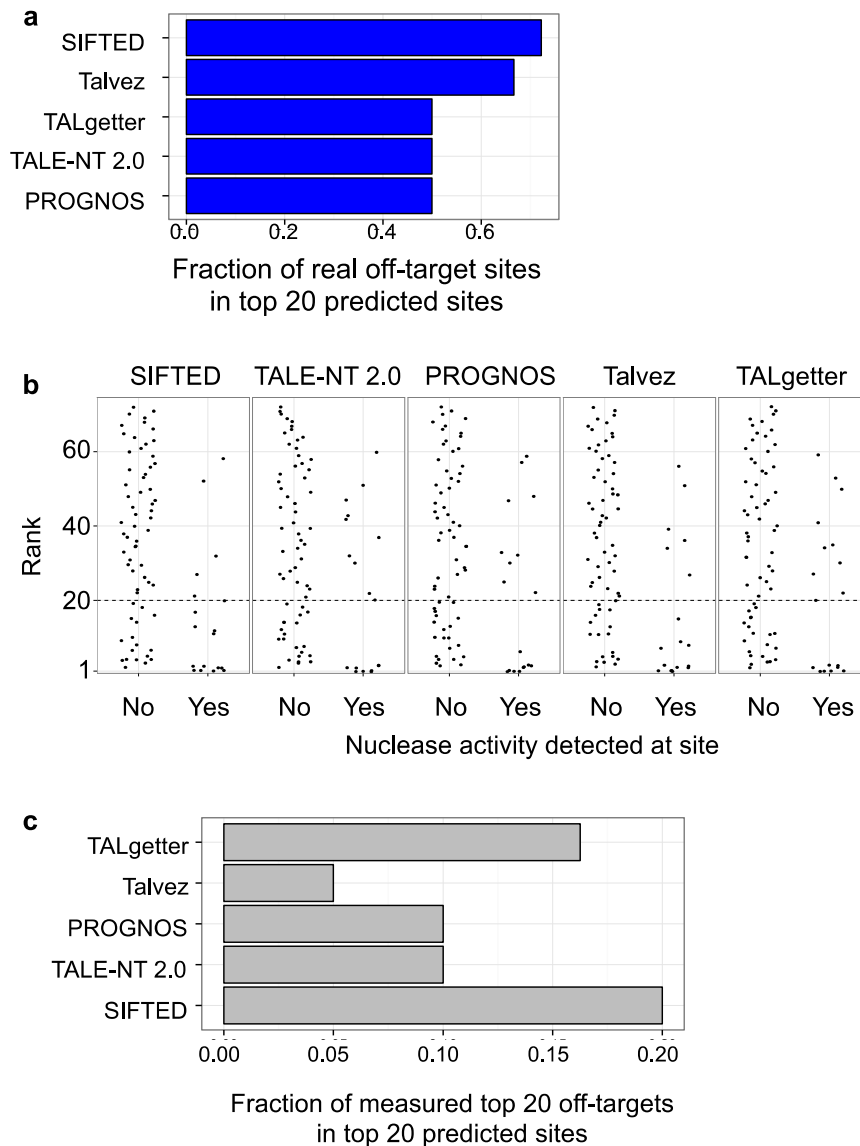

### Supplementary Figure 8

**(a)** Each of the five tools was used to predict off-target sites for the TALEN pairs tested in Guilinger *et al*<sup>1</sup>. The fraction of the top twenty sites predicted by each of the tools that had reported nuclease activity is shown. **(b)** The distribution of ranks of target sites with and without reported nuclease activity in Guilinger *et al.* is shown. The rank of scores of the predicted sites, determined by each of the five tools, is shown on the y-axis, and presence or absence of detected nuclease activity is shown on the x-axis. The dashed line marks the top twenty ranked sites. **(c)** The five tools were used to predict the specificity of the TALE activators tested in Mali *et al*<sup>2</sup>. The fraction of the top twenty sites with reported TALE activity is shown for each tool.

**Supplementary Table 1:** PBM experimental conditions for 21 TALE proteins assayed by PBMs

| Protein Name | Experiment Name  | Target Site  | PBM Concentration (nM) | Array Version (AMADID) | PWM used in training SIFTED? |
|--------------|------------------|--------------|------------------------|------------------------|------------------------------|
| TAL2002      | TAL2002_v2a_rep1 | TGGTGCCCAT   | 250                    | 059773                 |                              |
| TAL2002      | TAL2002_v2a_rep2 | TGGTGCCCAT   | 200                    | 059773                 | yes                          |
| TAL2003      | TAL2003_v2a_rep1 | TTACGTCGCC   | 250                    | 059773                 |                              |
| TAL2003      | TAL2003_v2a_rep2 | TTACGTCGCC   | 200                    | 059773                 | yes                          |
| TAL2009      | TAL2009_v1_rep1  | TAGGTGGCATC  | 200                    | 043197                 |                              |
| TAL2009      | TAL2009_v2a_rep1 | TAGGTGGCATC  | 250                    | 059773                 |                              |
| TAL2009      | TAL2009_v2a_rep2 | TAGGTGGCATC  | 250                    | 059775                 | yes                          |
| TAL2009      | TAL2009_v2a_rep3 | TAGGTGGCATC  | 500                    | 059773                 |                              |
| TAL2009      | TAL2009_v2a_rep4 | TAGGTGGCATC  | 200                    | 059773                 |                              |
| TAL2009      | TAL2009_v3_rep1  | TAGGTGGCATC  | 200                    | 063202                 |                              |
| TAL2016      | TAL2016_v1_rep1  | TAGAGGATCCAC | 200                    | 043197                 |                              |
| TAL2016      | TAL2016_v2a_rep1 | TAGAGGATCCAC | 250                    | 059773                 |                              |
| TAL2016      | TAL2016_v2a_rep2 | TAGAGGATCCAC | 250                    | 059775                 | yes                          |
| TAL2016      | TAL2016_v3_rep1  | TAGAGGATCCAC | 200                    | 063202                 |                              |
| TAL2017      | TAL2017_v2a_rep1 | TCGCCCTTGCTC | 200                    | 059773                 | yes                          |
| TAL2018      | TAL2018_v1_rep1  | TCCGGCGAGGGC | 200                    | 043197                 |                              |
| TAL2018      | TAL2018_v2b_rep1 | TCCGGCGAGGGC | 200                    | 060799                 | yes                          |
| TAL2020      | TAL2020_v1_rep1  | TGACCTACGGCG | 200                    | 043197                 |                              |
| TAL2020      | TAL2020_v2b_rep1 | TGACCTACGGCG | 250                    | 060799                 |                              |
| TAL2020      | TAL2020_v2b_rep2 | TGACCTACGGCG | 200                    | 060799                 | yes                          |

|         |                  |                |     |        |     |
|---------|------------------|----------------|-----|--------|-----|
| TAL2023 | TAL2023_v2b_rep1 | TCGGCGAGCTGC   | 100 | 060799 | yes |
| TAL2024 | TAL2024_v1_rep1  | TCCTGGTCGAGCT  | 200 | 043197 |     |
| TAL2024 | TAL2024_v2b_rep1 | TCCTGGTCGAGCT  | 250 | 060799 | yes |
| TAL2025 | TAL2025_v1_rep1  | TGAACTTGTGGCC  | 200 | 043197 |     |
| TAL2025 | TAL2025_v2a_rep1 | TGAACTTGTGGCC  | 250 | 059773 | yes |
| TAL2028 | TAL2028_v1_rep1  | TCTTCAAGTCCGC  | 200 | 043197 |     |
| TAL2028 | TAL2028_v2b_rep1 | TCTTCAAGTCCGC  | 200 | 060799 | yes |
| TAL2028 | TAL2028_v3_rep1  | TCTTCAAGTCCGC  | 200 | 063202 |     |
| TAL2029 | TAL2029_v1_rep1  | TGCGCTCCTGGAC  | 200 | 043197 |     |
| TAL2029 | TAL2029_v2b_rep1 | TGCGCTCCTGGAC  | 250 | 060799 |     |
| TAL2029 | TAL2029_v2b_rep2 | TGCGCTCCTGGAC  | 200 | 060799 | yes |
| TAL2029 | TAL2029_v3_rep1  | TGCGCTCCTGGAC  | 200 | 063202 |     |
| TAL2034 | TAL2034_v1_rep1  | TCCACCGGTCGCCA | 200 | 043197 | yes |
| TAL2036 | TAL2036_v2b_rep1 | TTCAGCGTGTCCGG | 310 | 060799 |     |
| TAL2036 | TAL2036_v2b_rep2 | TTCAGCGTGTCCGG | 250 | 060799 | yes |
| TAL2036 | TAL2036_v3_rep1  | TTCAGCGTGTCCGG | 200 | 063202 |     |
| TAL2037 | TAL2037_v2b_rep1 | TTGCCGTAGGTGGC | 340 | 060799 |     |
| TAL2037 | TAL2037_v2b_rep2 | TTGCCGTAGGTGGC | 250 | 060799 | yes |
| TAL2037 | TAL2037_v3_rep1  | TTGCCGTAGGTGGC | 200 | 063202 |     |
| TAL2039 | TAL2039_v2b_rep1 | TTGAAGAAGTCGTG | 350 | 060799 | yes |
| TAL2039 | TAL2039_v2b_rep2 | TTGAAGAAGTCGTG | 250 | 060799 |     |
| TAL2041 | TAL2041_v2a_rep1 | TTCTTCTGCTTGTC | 250 | 059775 |     |
| TAL2041 | TAL2041_v2a_rep2 | TTCTTCTGCTTGTC | 200 | 059773 | yes |
| TAL2041 | TAL2041_v2a_rep3 | TTCTTCTGCTTGTC | 200 | 059773 |     |



|         |                  |                          |     |        |     |
|---------|------------------|--------------------------|-----|--------|-----|
| TAL2041 | TAL2041_v2a_rep4 | TTCTTCTGCTTGTC           | 100 | 059773 |     |
| TAL2041 | TAL2041_v2a_rep5 | TTCTTCTGCTTGTC           | 50  | 059773 |     |
| TAL2043 | TAL2043_v2a_rep1 | TTGTGGCCGTTTACG          | 250 | 059775 | yes |
| TAL2043 | TAL2043_v3_rep1  | TTGTGGCCGTTTACG          | 200 | 063202 |     |
| TAL2046 | TAL2046_v1_rep1  | TGAACCGCATCGAGC          | 200 | 043197 |     |
| TAL2046 | TAL2046_v2b_rep1 | TGAACCGCATCGAGC          | 250 | 060799 | yes |
| TAL2046 | TAL2046_v3_rep1  | TGAACCGCATCGAGC          | 200 | 063202 |     |
| TAL2072 | TAL2072_v2b_rep1 | TTCACCGGGGTGGTGCC<br>CAT | 50  | 060799 | yes |
| TAL2072 | TAL2072_v3_rep1  | TTCACCGGGGTGGTGCC<br>CAT | 150 | 063202 |     |
| TAL2073 | TAL2073_v2b_rep1 | TTGTGGCCGTTTACGTC<br>GCC | 100 | 060799 | yes |
| TAL2073 | TAL2073_v3_rep1  | TTGTGGCCGTTTACGTC<br>GCC | 175 | 063202 |     |
| TAL2073 | TAL2073_v3_rep2  | TTGTGGCCGTTTACGTC<br>GCC | 200 | 063202 |     |

**Supplementary Table 1:** PBM experimental conditions for 21 TALE proteins assayed by PBMs

For all 21 proteins, target site and experimental conditions (array version and protein concentration) are provided. “Target site” is the target site predicted using the canonical TALE code. “Protein Concentration” is the TALE protein concentration used in the PBM experiment. “AMADID #” is the Agilent AMADID number of the array design used in the PBM experiment. The “PWM used in training SIFTED?” column indicates whether the PWM derived from that experiment was used to train the SIFTED model. For each protein, the experiment that produced the PWM with the highest  $R^2$  was chosen.

## **Supplementary Note 1 – Probe sets included in custom TALE PBM designs**

**All consecutive dinucleotide substitutions within the target site.** For each protein, the target site is predicted using the canonical TALE code, where the NI RVD targets A, HD targets C, NN targets G, and NG targets T. All target sites are preceded on the 5' end by a T. Sequences with all consecutive dinucleotide substitutions are generated. These target sites are positioned within constant flanking sequence. Present on array versions v1, v2a, and v2b.

**Additional target site substitutions.** The target site is predicted using the canonical TALE code, as above, and random sets of up to five substitutions are made. These target sites are positioned within constant flanking sequence. Present on array version v3.

**Clusters of substitutions at 5' and 3' end of binding site.** The target site is predicted using the canonical TALE code, as above, and clusters of three substitutions are introduced in the first three positions of the target site or in the last three positions. These target sites are positioned within constant flanking sequence. Present on array versions v2a and v2b.

The Agilent Array AMADID numbers for the array designs are: Version 1, 043197; Version 2a1, 059773; Version 2a2, 059775; Version 2b, 060799; and Version 3, 063202..

## SUPPLEMENTARY METHODS

### Position weight matrix model fitting

The statistical model below relates normalized probe signal intensity to the binding energy of the TALE protein to the binding site sequence represented on the probe. As an intermediate step, binding energy,  $\Delta\Delta G$ , predicts the occupancy of the TALE protein on its binding site. Occupancy is linearly related to probe signal intensity.

$$\text{PBM probe signal } Y_j = a + \frac{b}{1 + e^{\sum_i \Delta\Delta G_{i,j} - \mu}} + \epsilon_j$$

$$\Delta\Delta G_{i,j} \sim \text{Exp}(\beta) \quad \text{Energy matrix parameters (nucleotide } j \text{ at position } i)$$

$$\left. \begin{array}{l} a \sim U(-100.0, 100.0) \\ b \sim U(0, 1000.0) \end{array} \right\} \text{Define scaling between occupancy and signal intensities}$$

$$\mu \sim U(-20.0, 20.0) \quad \text{Chemical potential}$$

$$\epsilon_i \sim \mathcal{N}(0, \sigma^2) \quad \text{Gaussian noise}$$

### Algorithmic Approach of SIFTED web tool

In step 1, SIFTED requires that the candidate DNA target sequences are within the length range specified by the user and begin with a T on the 5' end. In step 2, the repeat sequence of the TALE that is predicted to target each candidate target DNA sequence is returned to the user.

Alternatively, a user can input a given RVD sequence, and proceed from step 3 to predict its' specificity. To enumerate all sequences in step 3, we first define a graph where each node represents a binding site sequence and edges exist between all nodes that are separated by one nucleotide mismatch. The root node for the search is the one with the lowest predicted change in free energy ( $\Delta\Delta G$ ) value, which is set to 0. The edge weights (also interpretable as the distance

between nodes) correspond to the change in free energy between sequences ( $\Delta\Delta G$ ), starting at the root node. Therefore, the sum of edge weights for any path within the network that begins at the root node must be nonnegative (cf. Dijkstra's algorithm<sup>3</sup>). In practice, this implies that no neighbors of a node with free energy that exceeds the threshold can themselves satisfy the threshold criterion (unless they are reachable through other nodes). This implies that we can efficiently search the graph in a breadth-first manner by only including the neighbors of nodes that have a  $\Delta\Delta G$  below the specified threshold in the search. In each iteration  $k$ , the nodes with  $k$  mismatches from the root node are explored, which also allows us to explicitly limit the search by the number of mismatches. As implemented online, the algorithm returns all binding site sequences below a particular relative  $K_d$  (off-target  $K_d$  / target  $K_d$ ) threshold (by default set to 10), which is converted to a  $\Delta\Delta G$  threshold using  $\Delta\Delta G = \ln(K_d)$ .

Once the target site sequences have been enumerated, we use a short-read mapping algorithm to find all of their genomic instances. Each of the predicted target site sequences is treated as if it were a read from a 2<sup>nd</sup> generation DNA sequencing instrument. However, since the input is given as a FASTA file, the read quality values are not applicable. We used *bowtie* v0.12.7 with flags "-all" (find all alignments for each read) and "-v 0" (report only hits with 0 end-to-end mismatches)<sup>4</sup>. The SAM output of bowtie is converted to a BED file with relative  $K_d$  values as interval scores, which the user can readily visualize or filter. Finally, the SIFTED pipeline returns a report in which the candidate proteins are ranked by the number of off-targets and their affinity by summing  $1/K_d$  for all the predicted targets of a given protein.

## Supplementary References

- 1 Guilinger, J. P. *et al.* Broad specificity profiling of TALENs results in engineered nucleases with improved DNA-cleavage specificity. *Nat Methods* **11**, 429-435, (2014).
- 2 Mali, P. *et al.* CAS9 transcriptional activators for target specificity screening and paired nickases for cooperative genome engineering. *Nat Biotechnol* **31**, 833-838, (2013).
- 3 Dijkstra, E. W. A Note on Two Problems in Connexion with Graphs. *Numerische Mathematik* **1**, 269-271, (1959).
- 4 Langmead, B., Trapnell, C., Pop, M. & Salzberg, S. L. Ultrafast and memory-efficient alignment of short DNA sequences to the human genome. *Genome Biol* **10**, R25, (2009).
